# Supplementary material for: A Comparative Study of the Adsorption of Methylene Blue onto Synthesized Nanoscale Zero-Valent Iron-Bamboo and Manganese-Bamboo Composites
Source: MDPI journal article supplement (doi:10.3390/ma7064493), 2014-06-12
Supplement: s1 [file s1]

## Supplementary Materials

### Highlights

- Bamboo impregnated with nanoscale zero-valent iron (nZVI) and manganese (nMn) were prepared by the aqueous phase borohydride reduction method.
- The precursors and composites were characterized by SEM, FTIR and PIXE analysis.
- Methylene blue adsorption capacity, isotherm and kinetics of these composites were investigated and compared.
- nZVI- and nMn-bamboo composites are better materials for the remediation of organic dyes from wastewaters.

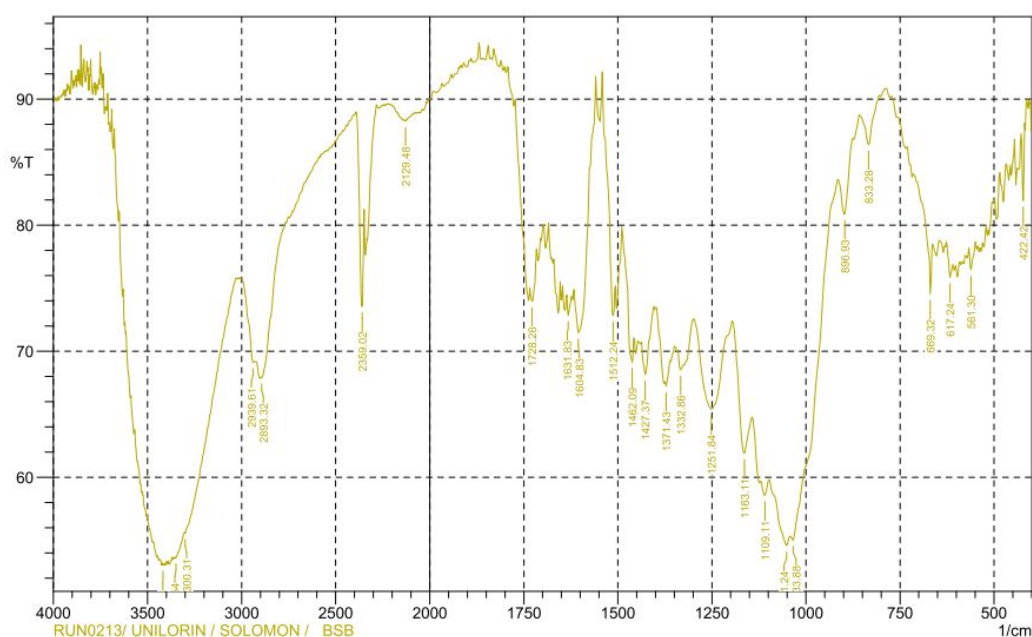

Figure S1. FTIR of Bamboo.

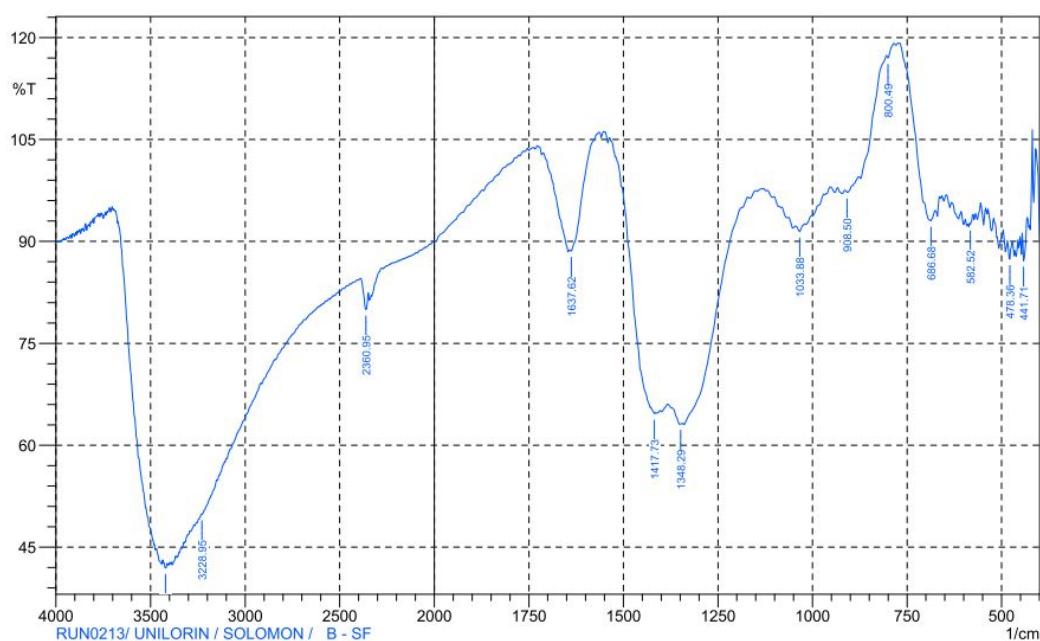

Figure S2. FTIR of nZVI.

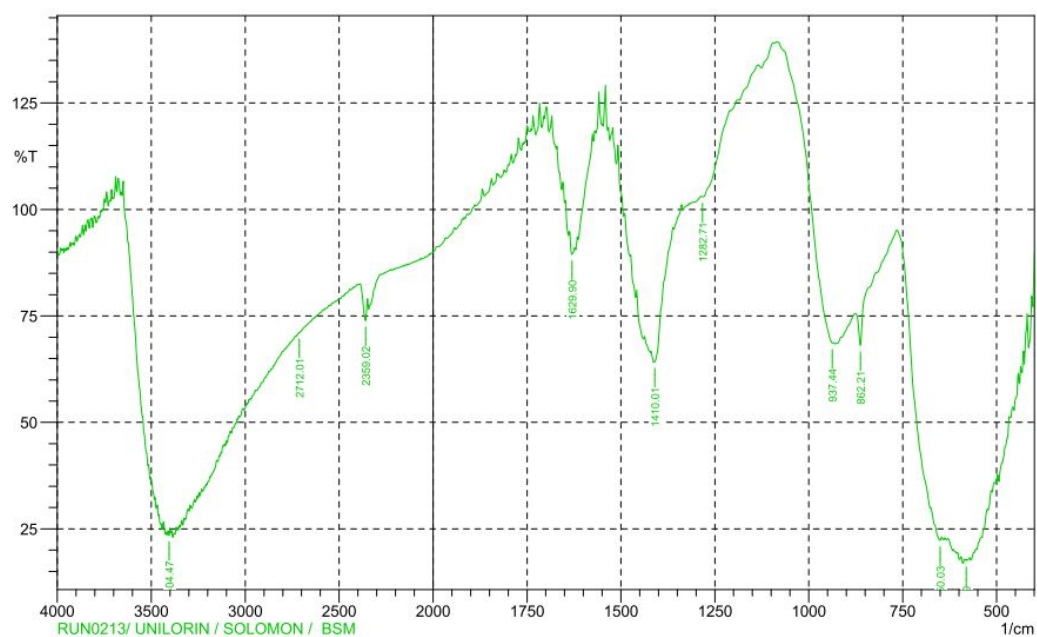

**Figure S3.** FTIR of nMn.

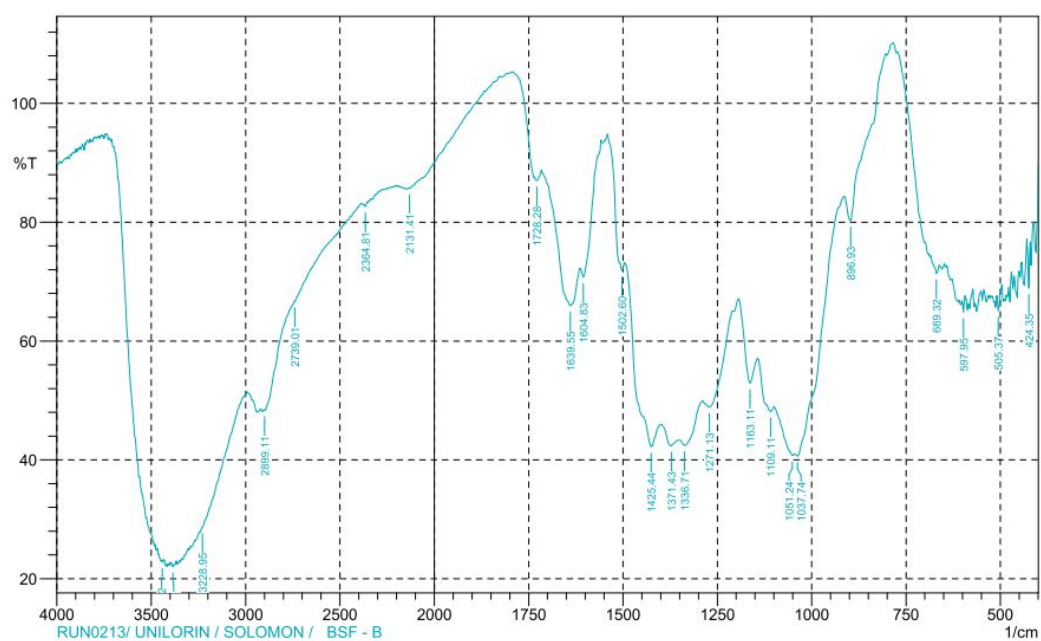

**Figure S4.** FTIR of nZVI-bamboo composite.

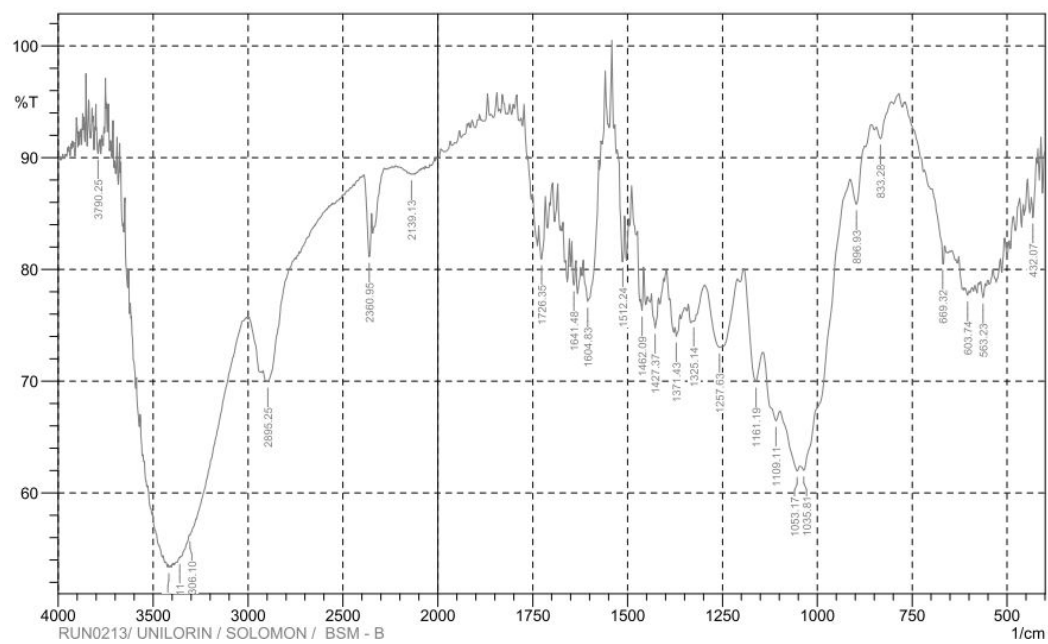

**Figure S5.** FTIR of nMn-bamboo composite.
